# Supplementary material for: The intrinsically disordered protein TgIST from Toxoplasma gondii inhibits STAT1 signaling by blocking cofactor recruitment
Source: PubMed Central journal article supplement (PMC9279507; doi:10.1038/s41467-022-31720-7), 2022-07-13
Supplement: 41467_2022_31720_MOESM3_ESM.pdf [file 41467_2022_31720_MOESM3_ESM.pdf]

## **Description of Additional Supplementary Files**

**Supplementary Data 1.** Summary of mass spectrometry analysis of human and Toxoplasma proteins immunoprecipitated with TgIST-Ty in U3A-STAT1 cells

**Supplementary Data 2.** Summary of mass spectrometry analysis of human and Toxoplasma proteins immunoprecipitated with TgIST-Ty in U3A-STAT1-null cells

**Supplementary Data 3.** Plasmids used in this study.

**Supplementary Data 4.** Oligonucleotides used in this study.
